# Supplementary material for: Surface decoration of phosphorene nanoribbons with 4d transition metal atoms for spintronics
Source: Royal Society of Chemistry journal article supplement (doi:10.1039/d0cp02101f), 2020-01-01
Supplement: d0cp02101f1.pdf [file d0cp02101f1.pdf]

Supplementary Information for

**Surface decoration of phosphorene nanoribbons via 4d transition  
metal atoms for spintronics**

Xiao-Xiao Fu<sup>a\*</sup>, Yue Niu<sup>a</sup>, Ze-Wen Hao, Mi-Mi Dong, Chuan-Kui Wang<sup>\*</sup>

Shandong Key Laboratory of Medical Physics and Image Processing & Shandong Provincial  
Engineering and Technical Center of Light Manipulations, School of Physics and Electronics,  
Shandong Normal University, Jinan 250358, China

<sup>a</sup> These authors contributed equally to this work.

<sup>\*</sup> E-mail: fuxiaoxiao@sdu.edu.cn; ckwang@sdu.edu.cn

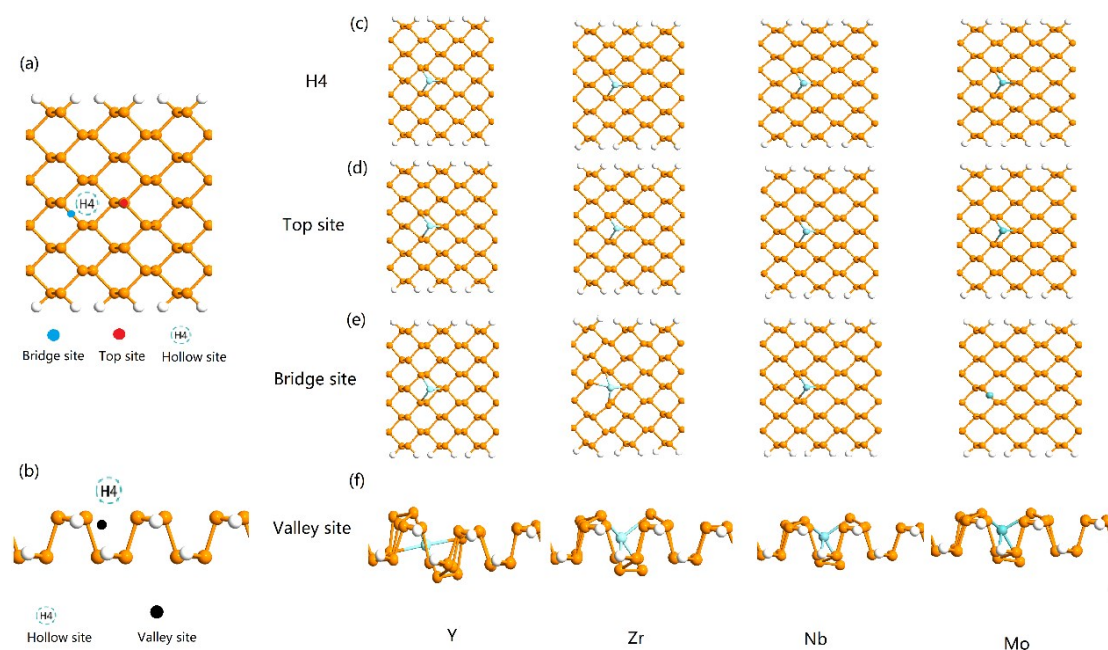

**Fig. S1** (a-b) Schematic views and (c-f) relaxed structures of X-adsorbed hydrogenated armchair phosphorene nanoribbons ( $X = Y, Zr, Nb$  and  $Mo$ ) with hollow, top, bridge and valley sites.

**Table S1** The formation energy ( $E_f$ ) and magnetic moment ( $M$ ) of the X-adsorbed ( $X = Y, Zr, Nb$  and  $Mo$ ) phosphorene nanoribbons with different initial adsorption sites.

| Atoms | Adsorption Site | $E_f$ (eV) | $M$  |
|-------|-----------------|------------|------|
| Y     | Hollow site     | -3.85      | 0.70 |
|       | Top site        | -3.86      | 0.72 |
|       | Bridge site     | -3.86      | 0.72 |
|       | Valley site     | -5.29      | 0.00 |
| Zr    | Hollow site     | -4.62      | 1.58 |
|       | Top site        | -4.62      | 1.59 |
|       | Bridge site     | -4.42      | 1.52 |
|       | Valley site     | -6.24      | 0.00 |
| Nb    | Hollow site     | -4.29      | 0.95 |
|       | Top site        | -4.29      | 0.94 |
|       | Bridge site     | -4.29      | 0.94 |
|       | Valley site     | -6.04      | 0.00 |
| Mo    | Hollow site     | -2.55      | 3.45 |
|       | Top site        | -2.55      | 3.45 |
|       | Bridge site     | -1.52      | 5.19 |
|       | Valley site     | -4.37      | 0.00 |

**Table S2.** Parameters for the adsorption with different hollow sites (H1-H4) and the substitutional doping (S) of 4d transition metal atoms ( $X = Y, Zr, Nb$  and  $Mo$ ) on hydrogenated armchair phosphorene nanoribbons, including the distortion of nanoribbons ( $\Delta Y_{\max}$ , the maximal displacement in the Y direction of P atoms from their initial position), the minimum X-P distance ( $d_{X-P}$ ), the formation energy ( $E_f$ ) and the magnetic moment ( $M$ ).

| Atoms | Site | $\Delta Y_{\max}$ (Å) | $d_{X-P}$ (Å) | $E_f$ (eV) | $M$  |
|-------|------|-----------------------|---------------|------------|------|
| Y     | H1   | 0.338                 | 2.68          | -3.94      | 0.72 |
|       | H2   | 0.106                 | 2.70          | -3.84      | 0.75 |
|       | H3   | 0.143                 | 2.72          | -3.84      | 0.71 |
|       | H4   | 0.150                 | 2.72          | -3.85      | 0.70 |
|       | S    | 0.468                 | 2.69          | -5.93      | 0.00 |
| Zr    | H1   | 0.400                 | 2.53          | -4.68      | 1.48 |
|       | H2   | 0.122                 | 2.55          | -4.58      | 1.60 |
|       | H3   | 0.130                 | 2.55          | -4.61      | 1.59 |
|       | H4   | 0.137                 | 2.55          | -4.62      | 1.58 |
|       | S    | 0.573                 | 2.58          | -6.84      | 0.63 |
| Nb    | H1   | 0.436                 | 2.39          | -4.40      | 0.94 |
|       | H2   | 0.138                 | 2.36          | -4.25      | 0.95 |
|       | H3   | 0.149                 | 2.36          | -4.28      | 0.94 |
|       | H4   | 0.149                 | 2.36          | -4.29      | 0.95 |
|       | S    | 0.567                 | 2.44          | -6.40      | 0.00 |
| Mo    | H1   | 0.0904                | 2.44          | -2.40      | 3.59 |
|       | H2   | 0.0782                | 2.45          | -2.51      | 3.50 |
|       | H3   | 0.0866                | 2.45          | -2.54      | 3.47 |
|       | H4   | 0.0899                | 2.45          | -2.55      | 3.45 |
|       | S    | 0.2783                | 2.48          | -4.51      | 2.82 |

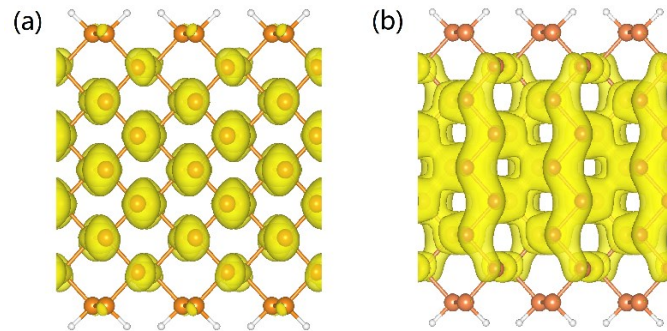

**Fig. S2** Charge density of (a) VBM and (b) CBM of the pure phosphorene nanoribbon.

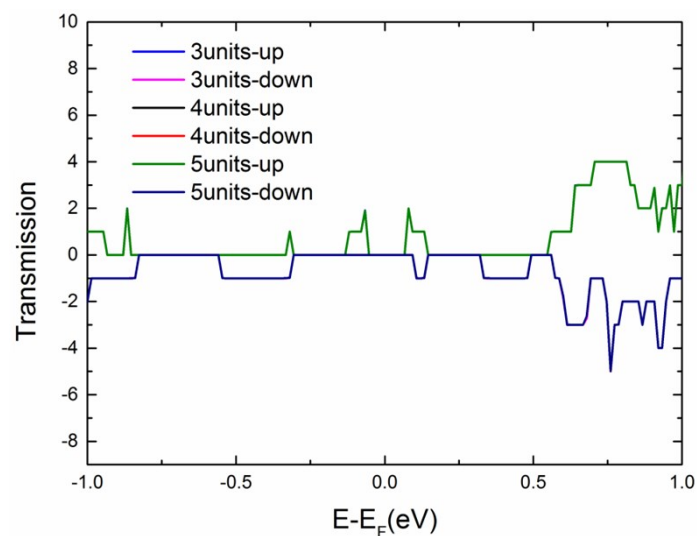

**Fig. S3** Transmission spectra of the Mo-adsorbed phosphorene nanoribbons with central region containing 3-, 4- and 5-units for parallel spin configurations, respectively. The consistency of these transmission spectra indicates the convergence of the length of nanoribbons taken account in the transport calculation.

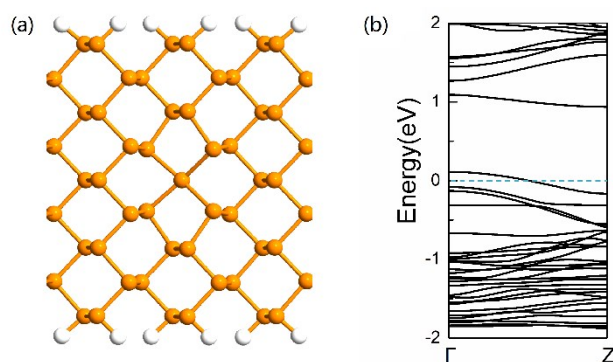

**Fig. S4** (a) The relaxed geometric structure and (b) the band structure of the pristine phosphorene nanoribbon with the single-atom vacancy.

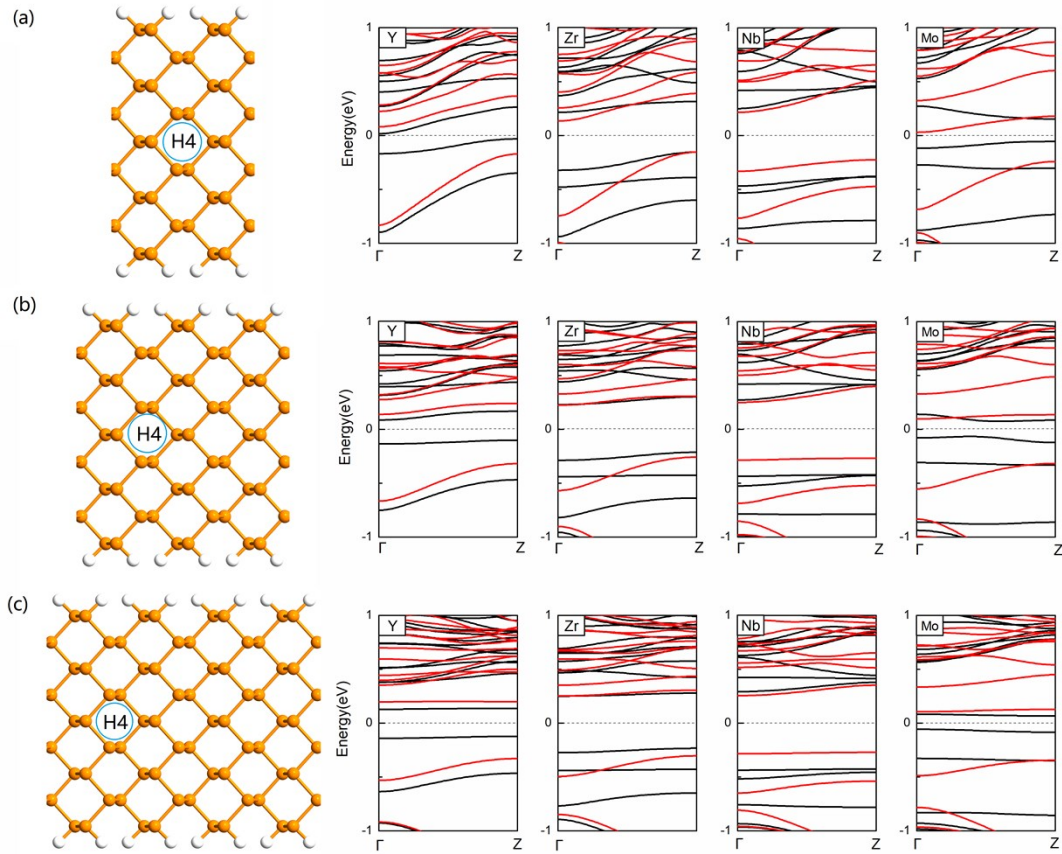

**Fig. S5** (a)-(c) The schematic structure and the band structure of the X-adsorbed phosphorene nanoribbons (X=Y, Zr, Nb and Mo) with different concentrations.

**Table S3** The band gap and magnetic moment ( $M$ ) for the X-adsorbed phosphorene nanoribbons (X=Y, Zr, Nb and Mo) with the concentration of 1.1%, 1.5% and 2.2%.

| Atoms | Concentration (%) | Band gap (eV) | $M$  |
|-------|-------------------|---------------|------|
| Y     | 1.1               | 0.25          | 0.66 |
|       | 1.5               | 0.19          | 0.70 |
|       | 2.2               | 0.05          | 0.68 |
| Zr    | 1.1               | 0.48          | 1.60 |
|       | 1.5               | 0.43          | 1.58 |
|       | 2.2               | 0.29          | 1.57 |
| Nb    | 1.1               | 0.53          | 0.95 |
|       | 1.5               | 0.52          | 0.95 |
|       | 2.2               | 0.44          | 0.95 |
| Mo    | 1.1               | 0.12          | 3.46 |
|       | 1.5               | 0.13          | 3.45 |
|       | 2.2               | 0.08          | 3.37 |

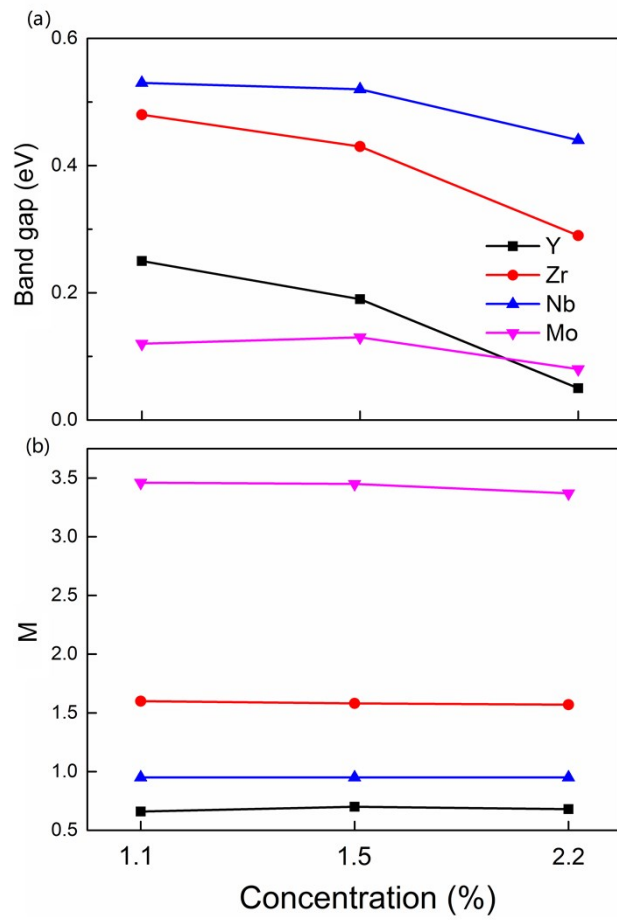

**Fig. S6** (a) and (b) The variation of the band gap and magnetic moment of the X-adsorbed phosphorene nanoribbons (X=Y, Zr, Nb and Mo) with adsorption concentration (1.1%, 1.5% and 2.2%).
